# Supplementary material for: The effect of fire history in shaping diversity patterns of flower-visiting insects in post-fire Mediterranean pine forests
Source: Springer Nature journal article supplement (doi:10.1007/s10531-016-1228-1), 2016-10-17
Supplement: MOESM1 [file 10888234]

**The effect of fire history in shaping diversity patterns of flower-visiting insects in post-fire Mediterranean pine forests**

**Biodiversity and Conservation**

Authors:

Maria Lazarinaa,b*, Stefanos P. Sgardelisb, Thomas Tscheulina, Jelle Devaleza,Vangelis Mizerakisa, Athanasios S. Kallimanisc, Spyridon Papakonstantinoud, Thanassis Kyriazisa, and Theodora Petanidoua

Affiliations of Corresponding Author:

aLaboratory of Biogeography & Ecology, Department of Geography, University of the Aegean, 81100 Mytilene, Greece.

bDepartment of Ecology, School of Biology, Aristotle University, 54124 Thessaloniki, Greece.

Address of Corresponding Author:

Maria Lazarina, Department of Ecology, School of Biology, Aristotle University, 54124 Thessaloniki, Greece. [mlazarin@bio.auth.gr](mailto:mlazarin@bio.auth.gr)

ESM1 Insect families of each guild recorded in the study region located in south-central Rhodes, Greece, employing UV-bright pantraps

| Guild | Family | Abundance | Richness |
| --- | --- | --- | --- |
| Bees |  | 1707 | 100 |
|  | Andrenidae | 163 | 24 |
|  | Apidae | 241 | 30 |
|  | Colletidae | 4 | 1 |
|  | Halictidae | 1172 | 21 |
|  | Megachilidae | 127 | 24 |
|  |  |  |  |
| Beetles |  | 3648 | 48 |
|  | Buprestidae | 536 | 17 |
|  | Cantharidae | 8 | 1 |
|  | Carabidae | 4 | 1 |
|  | Cerambycidae | 13 | 2 |
|  | Chrysomelidae | 137 | 2 |
|  | Cleridae | 490 | 2 |
|  | Curculionidae | 46 | 2 |
|  | Glaphyridae | 427 | 1 |
|  | Malachidae | 3 | 2 |
|  | Meloidae | 10 | 1 |
|  | Melyridae | 10 | 6 |
|  | Mordellidae | 2 | 1 |
|  | Oedemeridae | 65 | 4 |
|  | Scarabaeidae | 1882 | 4 |
|  | Tenebrionidae | 15 | 2 |
|  |  |  |  |
| Flies |  | 66 | 10 |
|  | Bombyliidae | 37 | 5 |
|  | Syrphidae | 29 | 5 |
| Sawflies |  | 524 | 6 |
|  | Argidae | 1 | 1 |
|  | Cimbicidae | 1 | 1 |
|  | Tenthredinidae | 522 | 4 |
|  |  |  |  |
| Wasps |  | 396 | 56 |
|  | Chrysididae | 176 | 14 |
|  | Crabronidae | 52 | 13 |
|  | Ichneumonidae | 3 | 3 |
|  | Pompilidae | 78 | 13 |
|  | Sapygidae | 1 | 1 |
|  | Scoliidae | 2 | 1 |
|  | Sphecidae | 4 | 2 |
|  | Tiphiidae | 6 | 1 |
|  | Vespidae | 74 | 8 |
