# Supplementary material for: The effect of fire history in shaping diversity patterns of flower-visiting insects in post-fire Mediterranean pine forests
Source: Springer Nature journal article supplement (doi:10.1007/s10531-016-1228-1), 2016-10-17

**The effect of fire history in shaping diversity patterns of flower-visiting insects in post-fire Mediterranean pine forests**

**Biodiversity and Conservation**

Authors:

Maria Lazarinaa,b*, Stefanos P. Sgardelisb, Thomas Tscheulina, Jelle Devaleza,Vangelis Mizerakisa, Athanasios S. Kallimanisc, Spyridon Papakonstantinoud, Thanassis Kyriazisa, and Theodora Petanidoua

Affiliations of Corresponding Author:

aLaboratory of Biogeography & Ecology, Department of Geography, University of the Aegean, 81100 Mytilene, Greece.

bDepartment of Ecology, School of Biology, Aristotle University, 54124 Thessaloniki, Greece.

Address of Corresponding Author:

Maria Lazarina, Department of Ecology, School of Biology, Aristotle University, 54124 Thessaloniki, Greece. [mlazarin@bio.auth.gr](mailto:mlazarin@bio.auth.gr)

ESM3Box plots showing the abundances of the entire flower-visitor community (a) and of each guild (b–f). The horizontal lines and the markers in each box indicate the medians and means respectively. Different letters indicate significant differences between groups, according to Generalized Linear Mixed Model analysis, with fire-history regime as fixed effect variable and site as categorical random variable. Fire-history regime abbreviations: TB = twice-burnt, RB = recently-burnt, LUB = long-unburnt (old-burnt and unburnt sites)


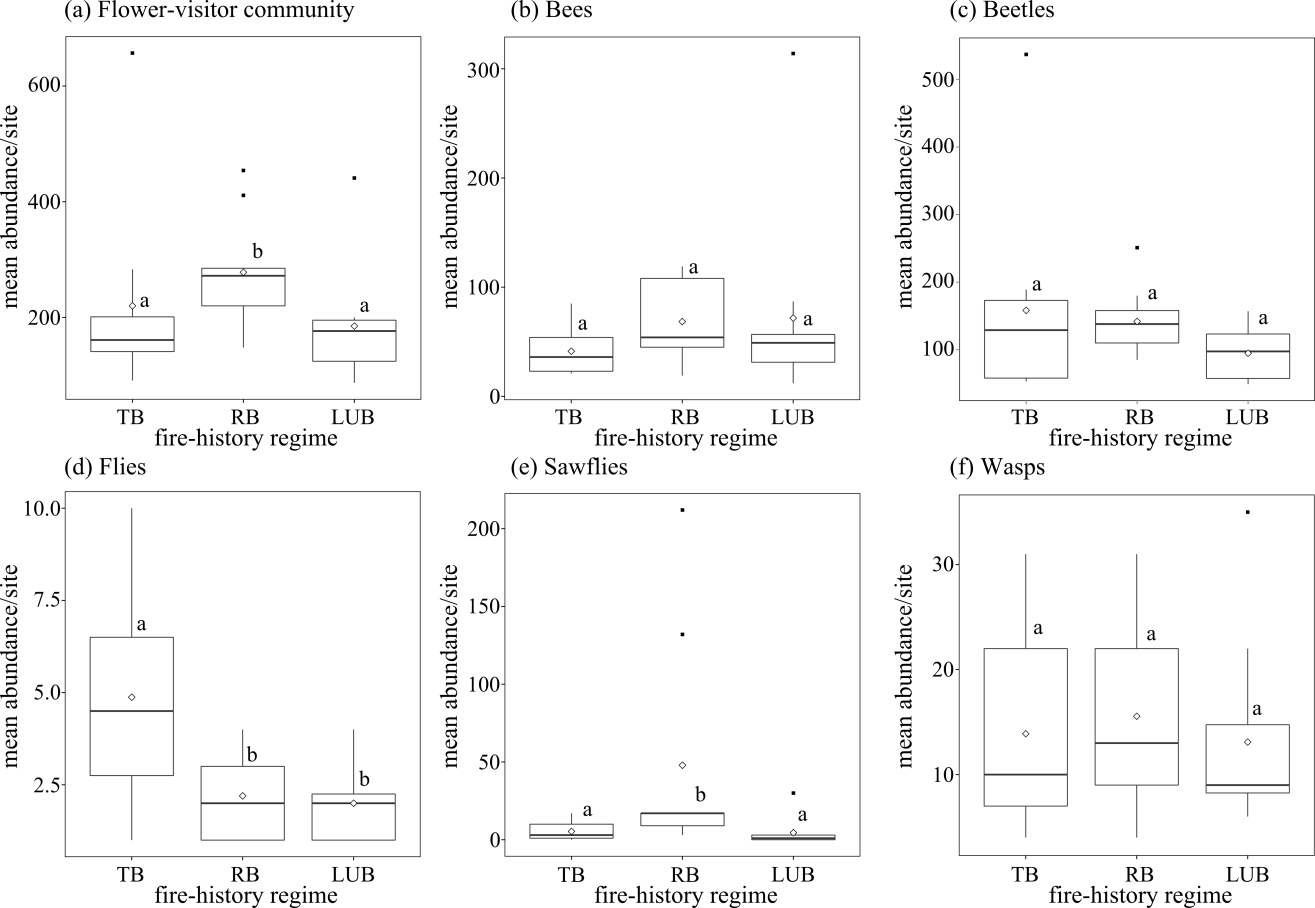

Supplement: MOESM3 [file 10888234]
